# Supplementary material for: Protein interactions in human genetic diseases
Source: Springer Nature journal article supplement (doi:10.1186/gb-2008-9-1-r9), 2008-01-16

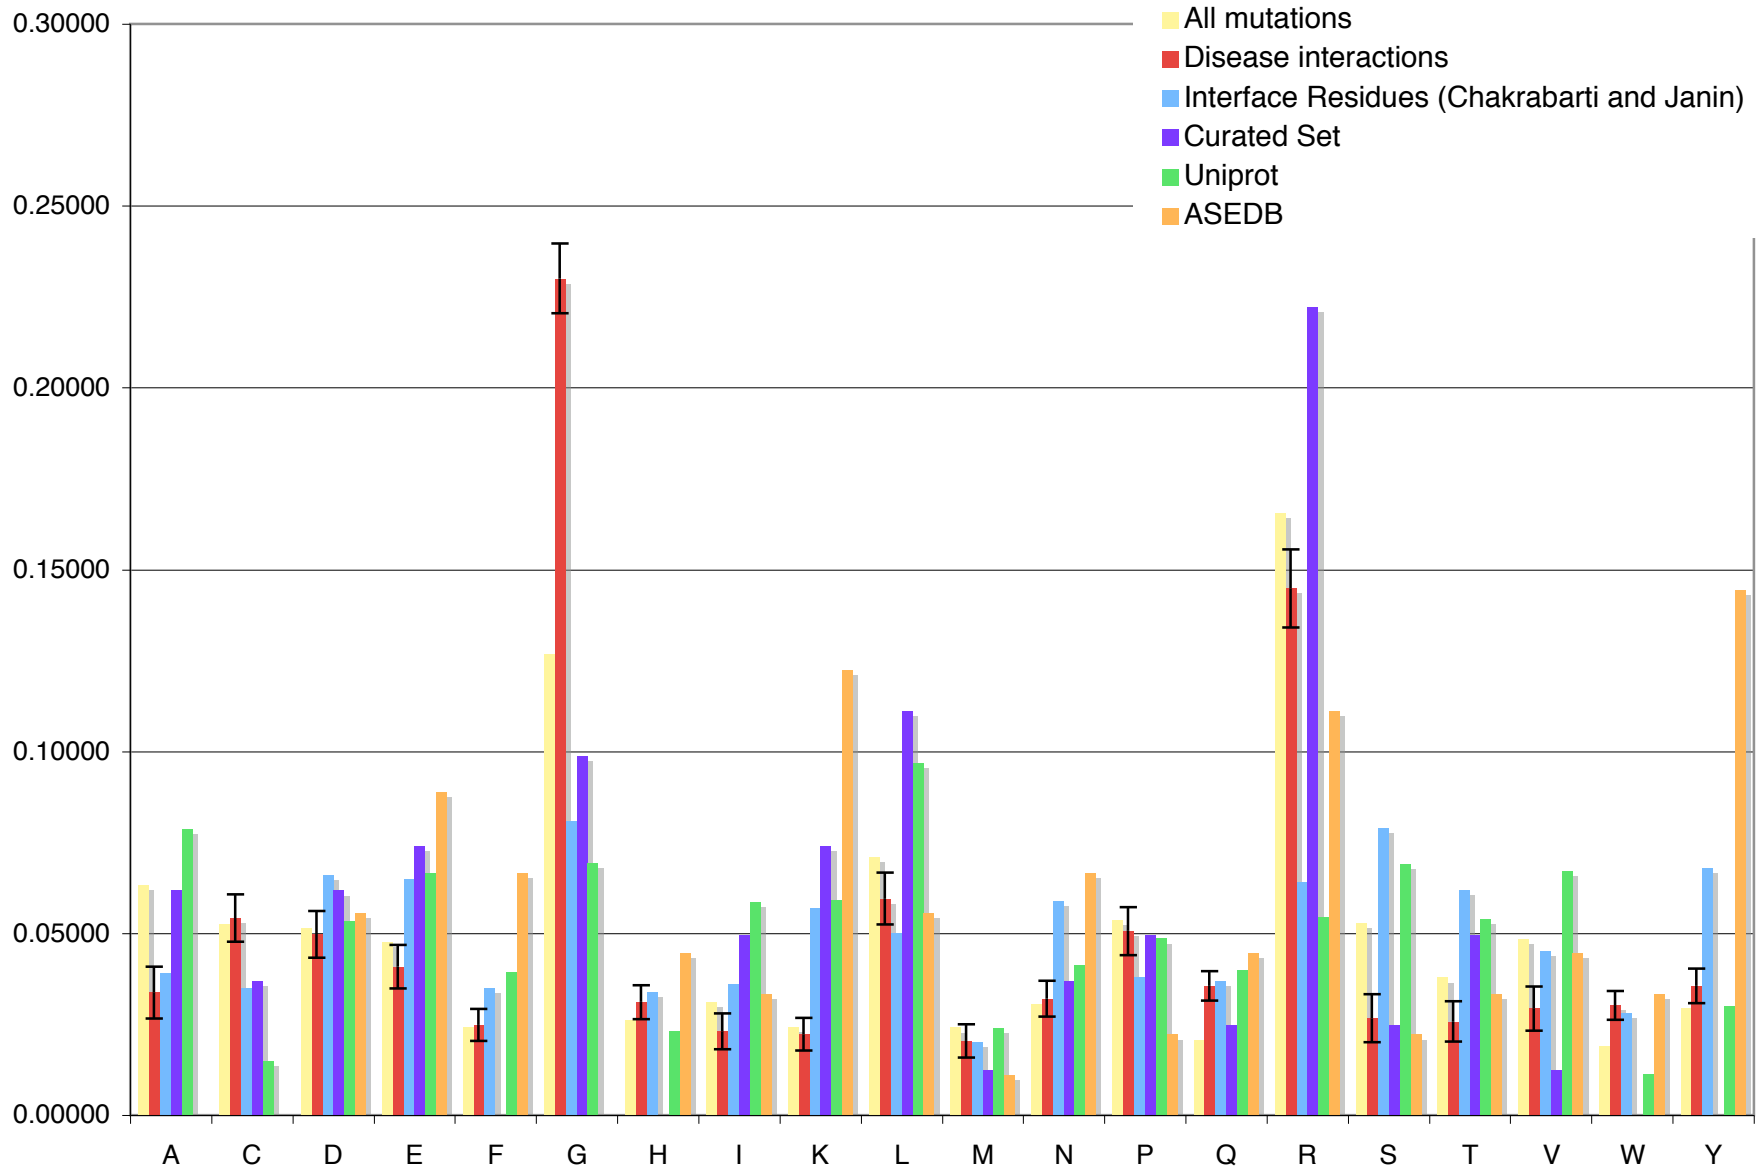

Supplement: Additional file 3 [file gb-2008-9-1-r9-s3.pdf]
